# Supplementary material
Source: PubMed Central journal article supplement (PMC6078457)
Supplement: supp_RA118.003022_136837_2_supp_150107_p9wqqw.pdf [file supp_RA118.003022_136837_2_supp_150107_p9wqqw.pdf]

**Supplementary Figure 1.** A) Growth of integrated Ulp2 C-terminal mutations on YPD at 30 °C. B) Cell growth of WT, *ulp2-SIM<sup>3A</sup>CCR<sup>3A</sup>F839D*, *ulp2-SIM<sup>PIASX</sup>CCR<sup>3A</sup>F839D* and *ulp2-SIM<sup>M-IR2</sup>CCR<sup>3A</sup>F839D* on indicated growth media at 30 °C.

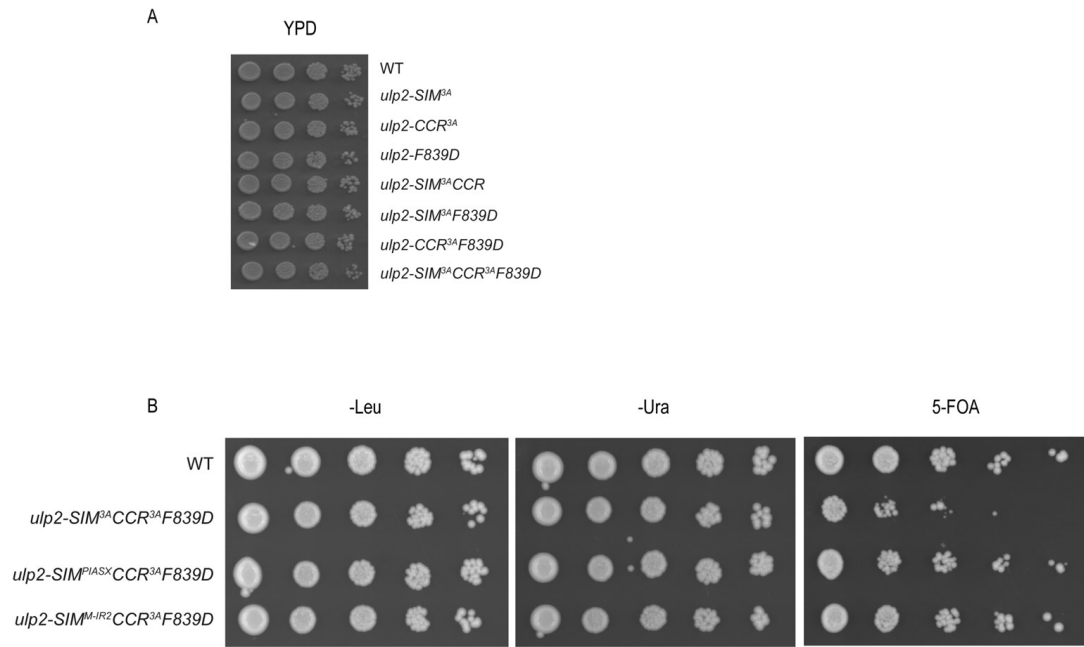

**Supplementary Figure 2.** A) Abundance of TAF tagged Ulp2 in the HF-SUMO strains used for quantitative MS analysis. Coomassie staining is shown as a loading control. B) Asynchronous cell cycle profiles of the *ulp2* mutants that were used for quantitative MS analysis. WT is also included for reference.

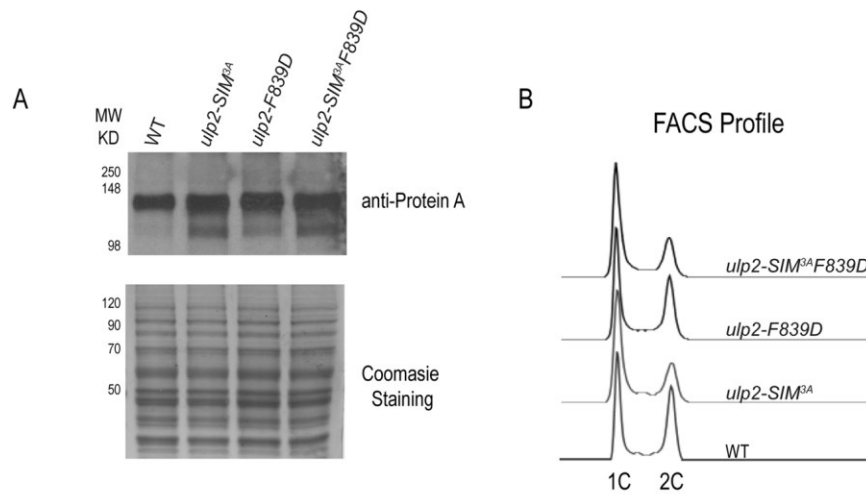

**Supplementary Table 1.** The average of the abundance ratios of the peptides derived from sumoylated Cdc14, Net1 and Tof2 in various *ulp2* mutants were calculated along with their standard deviations. The fold increase of sumoylated Tof2 is less pronounced than those of Net1 and Cdc14, and is due to an overall decrease in Tof2 abundance; which is dependent on poly-SUMO formation (21,29).

| Protein | <i>ulp2-SIM<sup>3A</sup> / WT</i> | <i>ulp2-F839D / WT</i> | <i>ulp2-SIM<sup>3A</sup> F839D / WT</i> |
|---------|-----------------------------------|------------------------|-----------------------------------------|
| Cdc14   | 17.7 ± 9.3                        | 9.6 ± 2.5              | 31.7 ± 12.5                             |
| Net1    | 10.6 ± 0.6                        | 5.1 ± 0.6              | 18.7 ± 1.7                              |
| Tof2    | 4.8 ± 0.6                         | 1.5 ± 0.4              | 5.9 ± 1.3                               |

**Supplementary Table 2.** Yeast strains and plasmids used in this study

| STRAIN NAME    | GENOTYPE                                                                                              | SOURCE                                 |
|----------------|-------------------------------------------------------------------------------------------------------|----------------------------------------|
| <b>HZY3658</b> | MAT a, <i>ulp2Δ::natMX4</i> , pRS316- <i>ULP2</i> , W303                                              | This study                             |
| <b>HZY2101</b> | MAT a, <i>HF-SMT3 sml1Δ::TRP1 arg4Δ ura3-52 leu2Δ1 trp1Δ63 his3Δ200 lys2ΔBgl hom3-10 ade2Δ ade8</i> . | Albuquerque, et al, PLoS genetics 2013 |
| <b>HZY3676</b> | MAT a, <i>NET1-HH::HIS3 HF-SMT3</i> , isogenic to HZY2101                                             | This study                             |
| <b>HZY3678</b> | MAT a, <i>NET1-HH::HIS3 ulp2-SIM<sup>3A</sup>::kanMX6 HF-SMT3</i> , derived from HZY3676              | This study                             |
| <b>HZY3679</b> | MAT a, <i>NET1-HH::HIS3 ulp2-F839D::kanMX6 HF-SMT3</i> , derived from HZY3676                         | This study                             |
| <b>HZY3680</b> | MAT a, <i>NET1-HH::HIS3 ulp2-SIM<sup>3A</sup>F839D::kanMX6 HF-SMT3</i> , derived from HZY3676         | This study                             |
| <b>HZY3973</b> | MAT a, <i>Ulp2-TAF::kanMX6 HF-SMT3</i> , derived from HZY2101                                         | This study                             |
| <b>HZY3963</b> | MAT a, <i>ulp2-SIM<sup>3A</sup>-TAF::kanMX6 HF-SMT3</i> , derived from HZY2101                        | This study                             |
| <b>HZY3966</b> | MAT a, <i>ulp2-F839D-TAF::kanMX6 HF-SMT3</i> , derived from HZY2101                                   | This study                             |
| <b>HZY3983</b> | MAT a, <i>ulp2-SIM<sup>3A</sup>F839D-TAF::kanMX6 HF-SMT3</i> , derived from HZY2101                   | This study                             |

|                |                                                                                                                                                               |                                |
|----------------|---------------------------------------------------------------------------------------------------------------------------------------------------------------|--------------------------------|
| <b>HZY621</b>  | MATa; <i>RDN1-NTS1::mURA3 ade2-1 can1-100 his3-11,15 leu2-3,112 trp1-1 ura3-1 RAD5+ cir0(2μm removed)</i> , also known as <i>JLY1096</i>                      | Liang et al. Genes & Dev. 2017 |
| <b>HZY001</b>  | <i>ulp2-SIM<sup>3A</sup>::kanMX6</i> , derived from <i>HZY621</i>                                                                                             | This study                     |
| <b>HZY002</b>  | <i>ulp2-CCR<sup>3A</sup>::kanMX6</i> , derived from <i>HZY621</i>                                                                                             | This study                     |
| <b>HZY035</b>  | <i>ulp2-F839D::kanMX6</i> , derived from <i>HZY621</i>                                                                                                        | This study                     |
| <b>HZY003</b>  | <i>ulp2-SIM<sup>3A</sup>, F839D::kanMX6</i> , derived from <i>HZY621</i>                                                                                      | This study                     |
| <b>HZY004</b>  | <i>ulp2-F839D, CCR<sup>3A</sup>::kanMX6</i> , derived from <i>HZY621</i>                                                                                      | This study                     |
| <b>HZY005</b>  | <i>ulp2-SIM<sup>3A</sup>, CCR<sup>3A</sup>::kanMX6</i> , derived from <i>HZY621</i>                                                                           | This study                     |
| <b>HZY006</b>  | <i>ulp2-SIM<sup>3A</sup>, F839D, CCR<sup>3A</sup>::kanMX6</i> , derived from <i>HZY621</i>                                                                    | This study                     |
|                |                                                                                                                                                               |                                |
| <b>PLASMID</b> | <b>DESCRIPTION</b>                                                                                                                                            | <b>SOURCE</b>                  |
| <b>HZE2340</b> | pRS315-Ulp2-TAF:: <i>kanMX6</i>                                                                                                                               | This study                     |
| <b>HZE2341</b> | pRS315- <i>ulp2-SIM<sup>3A</sup></i> -TAF:: <i>kanMX6</i>                                                                                                     | This study                     |
| <b>HZE2342</b> | pRS315- <i>ulp2-F839D</i> -TAF:: <i>kanMX6</i>                                                                                                                | This study                     |
| <b>HZE2527</b> | pRS315- <i>ulp2-CCR<sup>3A</sup></i> -TAF:: <i>kanMX6</i>                                                                                                     | This study                     |
| <b>HZE2343</b> | pRS315- <i>ulp2-(SIM<sup>3A</sup>, F839D)</i> -TAF:: <i>kanMX6</i>                                                                                            | This study                     |
| <b>HZE2525</b> | pRS315- <i>ulp2-(SIM<sup>3A</sup>, CCR<sup>3A</sup>)</i> -TAF:: <i>kanMX6</i>                                                                                 | This study                     |
| <b>HZE2526</b> | pRS315- <i>ulp2-(F839D, CCR<sup>3A</sup>)</i> -TAF:: <i>kanMX6</i>                                                                                            | This study                     |
| <b>HZE2439</b> | pRS315- <i>ulp2-(SIM<sup>3A</sup>, F839D, CCR<sup>3A</sup>)</i> -TAF:: <i>kanMX6</i>                                                                          | This study                     |
| <b>HZE1145</b> | LIC-2BT-Ulp2-(400-767)                                                                                                                                        | This study                     |
| <b>HZE1142</b> | LIC-2BT- <i>ulp2-SIM<sup>3A</sup></i> -(400-767)                                                                                                              | This study                     |
| <b>HZE2346</b> | Lic-2BT-Smt3 (1xSUMO)                                                                                                                                         | This study                     |
| <b>HZE2347</b> | LIC-2BT-2xSmt3 (2xSUMO)                                                                                                                                       | This study                     |
| <b>HZE2348</b> | LIC-2BT-4xSmt3 (4xSUMO)                                                                                                                                       | This study                     |
| <b>HZE2349</b> | LIC-2BT-6xSmt3 (6xSUMO)                                                                                                                                       | This study                     |
| <b>HZE2585</b> | pRS315- <i>ulp2 (PIASX-SIM, F839D, CCR<sup>3A</sup>)</i> -TAF:: <i>kanMX6</i> , Ulp2-SIM (sequence IQII) is substituted by PIASX-SIM (sequence: VDVIDL)       | This Study                     |
| <b>HZE2586</b> | pRS315- <i>ulp2 (M-IR2-SIM, F839D, CCR<sup>3A</sup>)</i> -TAF:: <i>kanMX6</i> . Ulp2-SIM (sequence IQII) is substituted by RanGAP M-IR2-SIM (sequence: VIIVW) | This Study                     |

- *HF-SMT3* refers to *6xHIS-3xFLAG-SMT3*. HH tag refers to *6xHIS-3xHA* tag. TAF refers to *6xHIS-3xFLAG-Protein A*.
- Lic-2BT plasmid contains N-terminal *6xHIS* and a TEV protease cleavage site sequence.

**Supplementary Table 3.** The median abundance ratios of the peptides derived from the SILAC SUMO proteomic experiment comparing HZY3963 (light media) and HZY 2101 (heavy media). A minimum requirement of 5 peptides IDs was used to filter the results.

| Light: HZY3963<br>Heavy: HZY2101 |        |              |                              |                  |
|----------------------------------|--------|--------------|------------------------------|------------------|
| ORF                              | Gene   | Median Ratio | Log <sub>2</sub> (Mutant/WT) | # of Peptide IDs |
| YLR314C                          | CDC3   | 0.70         | -0.52                        | 25               |
| YJR076C                          | CDC11  | 0.68         | -0.56                        | 6                |
| YDL225W                          | SHS1   | 0.67         | -0.58                        | 15               |
| YJR092W                          | BUD4   | 0.54         | -0.89                        | 6                |
| YKR095W                          | MLP1   | 0.85         | -0.23                        | 42               |
| YIL149C                          | MLP2   | 0.87         | -0.20                        | 38               |
| YJL041W                          | NSP1   | 0.36         | -1.48                        | 7                |
| YLR335W                          | NUP2   | 0.29         | -1.78                        | 15               |
| YOR341W                          | RPA190 | 1.20         | 0.26                         | 17               |
| YOR340C                          | RPA43  | 1.72         | 0.79                         | 8                |
| YBR049C                          | REB1   | 0.74         | -0.44                        | 26               |
| YJL140W                          | RPB4   | 0.39         | -1.34                        | 10               |
| YDL140C                          | RPO21  | 0.98         | -0.02                        | 48               |
| YOR194C                          | TOA1   | 0.48         | -1.06                        | 5                |
| YBR279W                          | PAF1   | 0.34         | -1.57                        | 13               |
| YPR133C                          | SPN1   | 0.37         | -1.42                        | 7                |
| YML010W                          | SPT5   | 0.51         | -0.98                        | 40               |
| YER148W                          | SPT15  | 2.47         | 1.31                         | 7                |
| YGR186W                          | TFG1   | 0.56         | -0.84                        | 34               |
| YLR399C                          | BDF1   | 0.49         | -1.03                        | 20               |
| YGR252W                          | GCN5   | 0.57         | -0.81                        | 16               |
| YGL066W                          | SGF73  | 0.58         | -0.79                        | 7                |
| YBR081C                          | SPT7   | 0.58         | -0.77                        | 42               |
| YKR025W                          | RPC37  | 0.40         | -1.34                        | 12               |
| YDL150W                          | RPC53  | 0.79         | -0.35                        | 16               |
| YPR190C                          | RPC82  | 0.64         | -0.64                        | 27               |
| YOR207C                          | RET1   | 0.51         | -0.97                        | 17               |
| YAL001C                          | TFC3   | 0.81         | -0.30                        | 39               |
| YNL039W                          | BDP1   | 1.04         | 0.06                         | 21               |
| YDR362C                          | TFC6   | 0.39         | -1.35                        | 6                |
| YOR110W                          | TFC7   | 0.80         | -0.33                        | 11               |

|         |         |      |       |    |
|---------|---------|------|-------|----|
| YGR246C | BRF1    | 0.81 | -0.31 | 24 |
| YOR113W | AZF1    | 0.61 | -0.70 | 10 |
| YOR028C | CIN5    | 0.50 | -1.01 | 9  |
| YCR084C | TUP1    | 0.46 | -1.12 | 41 |
| YBR112C | CYC8    | 0.48 | -1.05 | 17 |
| YNL167C | SKO1    | 0.43 | -1.21 | 23 |
| YPL181W | CTI6    | 0.42 | -1.24 | 13 |
| YNL027W | CRZ1    | 0.68 | -0.55 | 10 |
| YPL049C | DIG1    | 0.41 | -1.29 | 5  |
| YHR084W | STE12   | 0.44 | -1.18 | 9  |
| YBR083W | TEC1    | 0.87 | -0.20 | 12 |
| YNL199C | GCR2    | 0.27 | -1.88 | 5  |
| YLR256W | HAP1    | 1.00 | 0.00  | 7  |
| YNL103W | MET4    | 0.49 | -1.03 | 16 |
| YDR176W | NGG1    | 0.48 | -1.05 | 12 |
| YDR310C | SUM1    | 0.59 | -0.77 | 57 |
| YER111C | SWI4    | 0.70 | -0.52 | 15 |
| YOR344C | TYE7    | 2.21 | 1.15  | 8  |
| YDR213W | UPC2    | 0.54 | -0.89 | 16 |
| YIL056W | VHR1    | 0.63 | -0.67 | 7  |
| YER064C | YER064C | 1.94 | 0.96  | 10 |
| YPL228W | CET1    | 0.30 | -1.76 | 25 |
| YAL032C | PRP45   | 0.72 | -0.48 | 7  |
| YMR229C | RRP5    | 1.25 | 0.32  | 7  |
| YDR464W | SPP41   | 1.04 | 0.05  | 86 |
| YDR169C | STB3    | 0.84 | -0.25 | 14 |
| YOR038C | HIR2    | 0.38 | -1.39 | 20 |
| YBR215W | HPC2    | 0.38 | -1.39 | 23 |
| YDR174W | HMO1    | 1.13 | 0.18  | 6  |
| YBR245C | ISW1    | 0.55 | -0.86 | 34 |
| YML069W | POB3    | 0.49 | -1.04 | 18 |
| YOL004W | SIN3    | 0.63 | -0.67 | 19 |
| YDR359C | VID21   | 0.47 | -1.10 | 24 |
| YGR056W | RSC1    | 0.48 | -1.07 | 23 |
| YLR357W | RSC2    | 0.57 | -0.81 | 50 |
| YFR037C | RSC8    | 0.43 | -1.20 | 22 |
| YLR033W | RSC58   | 0.48 | -1.06 | 18 |
| YMR091C | NPL6    | 0.74 | -0.43 | 7  |
| YIL126W | STH1    | 0.64 | -0.64 | 33 |
| YDR190C | RVB1    | 0.39 | -1.34 | 9  |
| YOR290C | SNF2    | 0.79 | -0.33 | 23 |

|         |         |       |       |     |
|---------|---------|-------|-------|-----|
| YBR289W | SNF5    | 0.66  | -0.59 | 9   |
| YJL176C | SWI3    | 0.64  | -0.63 | 18  |
| YDR334W | SWR1    | 0.61  | -0.72 | 35  |
| YAL011W | SWC3    | 0.43  | -1.21 | 20  |
| YDR485C | VPS72   | 0.52  | -0.96 | 36  |
| YDL197C | ASF2    | 0.64  | -0.65 | 8   |
| YKL172W | EBP2    | 0.91  | -0.13 | 7   |
| YDR110W | FOB1    | 2.31  | 1.21  | 20  |
| YFR028C | CDC14   | 20.07 | 4.33  | 20  |
| YJL076W | NET1    | 10.64 | 3.41  | 138 |
| YNL216W | RAP1    | 0.60  | -0.73 | 34  |
| YLR442C | SIR3    | 0.93  | -0.11 | 22  |
| YDR227W | SIR4    | 0.74  | -0.43 | 65  |
| YKR010C | TOF2    | 4.43  | 2.15  | 29  |
| YFL008W | SMC1    | 1.00  | 0.00  | 11  |
| YJL074C | SMC3    | 1.40  | 0.49  | 13  |
| YDL003W | MCD1    | 2.26  | 1.17  | 12  |
| YFR031C | SMC2    | 1.50  | 0.58  | 24  |
| YLR086W | SMC4    | 1.08  | 0.11  | 41  |
| YBL097W | BRN1    | 0.94  | -0.08 | 20  |
| YOL034W | SMC5    | 1.04  | 0.06  | 16  |
| YLR383W | SMC6    | 0.91  | -0.14 | 8   |
| YJR089W | BIR1    | 0.69  | -0.53 | 53  |
| YGR140W | CBF2    | 1.56  | 0.64  | 28  |
| YBR156C | SLI15   | 0.42  | -1.26 | 26  |
| YKL112W | ABF1    | 0.58  | -0.78 | 30  |
| YLL004W | ORC3    | 0.88  | -0.19 | 7   |
| YBR088C | POL30   | 0.67  | -0.57 | 14  |
| YOL006C | TOP1    | 1.47  | 0.56  | 27  |
| YNL088W | TOP2    | 1.14  | 0.19  | 34  |
| YAL027W | YAL027W | 0.73  | -0.44 | 5   |
| YBR114W | RAD16   | 0.55  | -0.86 | 17  |
| YPR180W | AOS1    | 0.77  | -0.39 | 7   |
| YDR390C | UBA2    | 1.09  | 0.13  | 15  |
| YDL064W | UBC9    | 0.39  | -1.35 | 7   |
| YDR409W | SIZ1    | 0.54  | -0.88 | 18  |
| YOR156C | NFI1    | 1.17  | 0.23  | 7   |
| YNL042W | BOP3    | 1.07  | 0.09  | 12  |
| YDL126C | CDC48   | 4.75  | 2.25  | 43  |
| YDR385W | EFT2    | 1.71  | 0.77  | 11  |
| YGR254W | ENO1    | 5.84  | 2.55  | 15  |

|         |         |      |       |    |
|---------|---------|------|-------|----|
| YKL142W | MRP8    | 0.93 | -0.10 | 5  |
| YLR044C | PDC1    | 2.22 | 1.15  | 16 |
| YCR012W | PGK1    | 1.83 | 0.87  | 25 |
| YOR191W | RIS1    | 1.27 | 0.34  | 18 |
| YJL138C | TIF2    | 0.83 | -0.27 | 13 |
| YMR111C | YMR111C | 1.13 | 0.18  | 32 |
| YBL023C | MCM2    | 2.74 | 1.45  | 7  |
| YEL032W | MCM3    | 5.73 | 2.52  | 12 |

**Supplementary Table 4.** The median abundance ratios of the peptides derived from the SILAC SUMO proteomic experiment comparing HZY3966 (light media) and HZY 2101 (heavy media). A minimum requirement of 5 peptides IDs was used to filter the results.

| Light: HZY3966<br>Heavy: HZY2101 |        |              |                              |                  |
|----------------------------------|--------|--------------|------------------------------|------------------|
| ORF                              | Gene   | Median Ratio | Log <sub>2</sub> (Mutant/WT) | # of Peptide IDs |
| YLR314C                          | CDC3   | 0.78         | -0.37                        | 29               |
| YJR076C                          | CDC11  | 0.81         | -0.30                        | 14               |
| YDL225W                          | SHS1   | 0.86         | -0.22                        | 20               |
| YJR092W                          | BUD4   | 1.03         | 0.05                         | 11               |
| YGL086W                          | MAD1   | 2.10         | 1.07                         | 8                |
| YKR095W                          | MLP1   | 1.83         | 0.87                         | 87               |
| YIL149C                          | MLP2   | 1.55         | 0.64                         | 75               |
| YJL041W                          | NSP1   | 1.65         | 0.72                         | 12               |
| YOR098C                          | NUP1   | 5.25         | 2.39                         | 6                |
| YLR335W                          | NUP2   | 1.10         | 0.13                         | 18               |
| YAR002W                          | NUP60  | 1.21         | 0.28                         | 7                |
| YPR010C                          | RPA135 | 1.74         | 0.80                         | 8                |
| YOR341W                          | RPA190 | 1.54         | 0.62                         | 22               |
| YOR340C                          | RPA43  | 0.96         | -0.05                        | 9                |
| YOR295W                          | UAF30  | 2.28         | 1.19                         | 6                |
| YBR049C                          | REB1   | 1.11         | 0.15                         | 47               |
| YJL140W                          | RPB4   | 0.40         | -1.34                        | 10               |
| YDL140C                          | RPO21  | 0.86         | -0.22                        | 60               |
| YBR198C                          | TAF5   | 0.95         | -0.07                        | 15               |
| YDR145W                          | TAF12  | 0.63         | -0.67                        | 13               |
| YOR194C                          | TOA1   | 0.52         | -0.94                        | 19               |
| YGL151W                          | NUT1   | 1.69         | 0.76                         | 5                |
| YBR279W                          | PAF1   | 1.04         | 0.06                         | 14               |
| YPR133C                          | SPN1   | 0.45         | -1.14                        | 12               |



|         |         |      |       |    |
|---------|---------|------|-------|----|
| YML010W | SPT5    | 0.60 | -0.74 | 67 |
| YER148W | SPT15   | 1.00 | 0.00  | 10 |
| YGR186W | TFG1    | 0.52 | -0.94 | 51 |
| YLR399C | BDF1    | 0.65 | -0.62 | 31 |
| YGR252W | GCN5    | 0.91 | -0.14 | 24 |
| YGL066W | SGF73   | 0.98 | -0.04 | 10 |
| YBR081C | SPT7    | 1.22 | 0.29  | 75 |
| YKR025W | RPC37   | 0.47 | -1.10 | 14 |
| YDL150W | RPC53   | 0.59 | -0.77 | 26 |
| YPR190C | RPC82   | 0.61 | -0.71 | 25 |
| YOR207C | RET1    | 0.50 | -1.00 | 30 |
| YAL001C | TFC3    | 0.74 | -0.44 | 58 |
| YGR047C | TFC4    | 1.14 | 0.19  | 6  |
| YNL039W | BDP1    | 0.43 | -1.20 | 41 |
| YDR362C | TFC6    | 0.55 | -0.85 | 11 |
| YOR110W | TFC7    | 0.51 | -0.98 | 9  |
| YGR246C | BRF1    | 0.57 | -0.81 | 27 |
| YOR113W | AZF1    | 1.18 | 0.24  | 22 |
| YJR060W | CBF1    | 0.94 | -0.09 | 8  |
| YOR028C | CIN5    | 0.27 | -1.91 | 11 |
| YCR084C | TUP1    | 0.69 | -0.53 | 57 |
| YBR112C | CYC8    | 0.76 | -0.39 | 25 |
| YNL167C | SKO1    | 0.93 | -0.11 | 32 |
| YPL181W | CTI6    | 0.89 | -0.18 | 16 |
| YNL027W | CRZ1    | 0.83 | -0.27 | 7  |
| YIL036W | CST6    | 0.72 | -0.48 | 8  |
| YPL049C | DIG1    | 0.82 | -0.28 | 11 |
| YHR084W | STE12   | 0.91 | -0.14 | 9  |
| YBR083W | TEC1    | 1.31 | 0.38  | 19 |
| YNL199C | GCR2    | 0.45 | -1.16 | 8  |
| YLR256W | HAP1    | 0.83 | -0.27 | 23 |
| YOR032C | HMS1    | 0.97 | -0.04 | 6  |
| YNL103W | MET4    | 0.37 | -1.45 | 26 |
| YDR176W | NGG1    | 0.92 | -0.13 | 21 |
| YBL066C | SEF1    | 1.95 | 0.97  | 9  |
| YDR310C | SUM1    | 1.29 | 0.37  | 76 |
| YER111C | SWI4    | 0.91 | -0.14 | 21 |
| YOR344C | TYE7    | 0.31 | -1.69 | 13 |
| YDR213W | UPC2    | 1.25 | 0.32  | 20 |
| YIL056W | VHR1    | 2.07 | 1.05  | 8  |
| YER064C | YER064C | 0.70 | -0.51 | 18 |

|         |        |      |       |     |
|---------|--------|------|-------|-----|
| YOR230W | WTM1   | 1.30 | 0.38  | 10  |
| YPL228W | CET1   | 0.38 | -1.39 | 41  |
| YAL032C | PRP45  | 2.53 | 1.34  | 19  |
| YMR229C | RRP5   | 2.02 | 1.01  | 28  |
| YDR464W | SPP41  | 1.23 | 0.30  | 122 |
| YDR169C | STB3   | 0.96 | -0.06 | 25  |
| YOR038C | HIR2   | 2.01 | 1.01  | 29  |
| YBR215W | HPC2   | 1.65 | 0.72  | 39  |
| YDR174W | HMO1   | 2.65 | 1.40  | 12  |
| YBR245C | ISW1   | 1.02 | 0.02  | 61  |
| YOR304W | ISW2   | 1.09 | 0.13  | 5   |
| YML069W | POB3   | 0.84 | -0.26 | 21  |
| YOL004W | SIN3   | 1.00 | 0.00  | 39  |
| YDR359C | VID21  | 0.97 | -0.04 | 39  |
| YGR056W | RSC1   | 1.01 | 0.02  | 38  |
| YLR357W | RSC2   | 1.03 | 0.04  | 82  |
| YFR037C | RSC8   | 0.69 | -0.54 | 36  |
| YLR033W | RSC58  | 0.76 | -0.39 | 30  |
| YMR091C | NPL6   | 0.72 | -0.48 | 10  |
| YIL126W | STH1   | 0.90 | -0.15 | 60  |
| YGR275W | RTT102 | 0.90 | -0.14 | 6   |
| YDR190C | RVB1   | 0.60 | -0.74 | 11  |
| YPL235W | RVB2   | 0.64 | -0.63 | 8   |
| YOR290C | SNF2   | 1.27 | 0.34  | 36  |
| YBR289W | SNF5   | 0.78 | -0.36 | 13  |
| YJL176C | SWI3   | 0.74 | -0.44 | 28  |
| YDR334W | SWR1   | 1.08 | 0.11  | 44  |
| YAL011W | SWC3   | 0.81 | -0.30 | 34  |
| YDR485C | VPS72  | 0.84 | -0.25 | 41  |
| YDL197C | ASF2   | 0.48 | -1.07 | 17  |
| YKL172W | EBP2   | 0.79 | -0.34 | 16  |
| YDR110W | FOB1   | 1.04 | 0.05  | 20  |
| YNL132W | KRE33  | 2.97 | 1.57  | 9   |
| YFR028C | CDC14  | 9.58 | 3.26  | 28  |
| YJL076W | NET1   | 5.30 | 2.41  | 147 |
| YNL216W | RAP1   | 1.07 | 0.10  | 49  |
| YBR275C | RIF1   | 1.06 | 0.09  | 9   |
| YLR442C | SIR3   | 1.20 | 0.27  | 38  |
| YDR227W | SIR4   | 0.91 | -0.14 | 91  |
| YKR010C | TOF2   | 1.42 | 0.51  | 33  |
| YFL008W | SMC1   | 1.83 | 0.87  | 17  |

|         |         |      |       |    |
|---------|---------|------|-------|----|
| YJL074C | SMC3    | 1.35 | 0.43  | 17 |
| YDL003W | MCD1    | 1.07 | 0.10  | 11 |
| YFR031C | SMC2    | 0.64 | -0.64 | 22 |
| YLR086W | SMC4    | 0.52 | -0.95 | 41 |
| YBL097W | BRN1    | 0.41 | -1.30 | 27 |
| YOL034W | SMC5    | 1.72 | 0.78  | 33 |
| YLR383W | SMC6    | 2.10 | 1.07  | 21 |
| YJR089W | BIR1    | 0.70 | -0.52 | 67 |
| YGR140W | CBF2    | 0.87 | -0.20 | 36 |
| YBR156C | SLI15   | 0.48 | -1.07 | 51 |
| YKL112W | ABF1    | 1.31 | 0.39  | 38 |
| YLL004W | ORC3    | 1.55 | 0.64  | 13 |
| YGL201C | MCM6    | 1.23 | 0.29  | 13 |
| YBR088C | POL30   | 0.61 | -0.71 | 18 |
| YOL006C | TOP1    | 0.95 | -0.07 | 38 |
| YNL088W | TOP2    | 0.87 | -0.20 | 47 |
| YAL027W | YAL027W | 1.05 | 0.07  | 8  |
| YBR114W | RAD16   | 0.90 | -0.15 | 35 |
| YPR180W | AOS1    | 1.13 | 0.17  | 11 |
| YDR390C | UBA2    | 1.40 | 0.49  | 23 |
| YDL064W | UBC9    | 1.12 | 0.16  | 15 |
| YDR409W | SIZ1    | 1.05 | 0.07  | 23 |
| YOR156C | NFI1    | 0.76 | -0.40 | 16 |
| YNL042W | BOP3    | 1.99 | 0.99  | 32 |
| YDL126C | CDC48   | 0.69 | -0.54 | 37 |
| YDR385W | EFT2    | 0.84 | -0.24 | 25 |
| YGR254W | ENO1    | 1.09 | 0.13  | 11 |
| YLL026W | HSP104  | 1.62 | 0.69  | 5  |
| YKL142W | MRP8    | 2.60 | 1.38  | 12 |
| YOL070C | YOL070C | 0.49 | -1.02 | 6  |
| YLR044C | PDC1    | 0.98 | -0.03 | 21 |
| YCR012W | PGK1    | 1.21 | 0.27  | 25 |
| YOR191W | RIS1    | 0.47 | -1.10 | 16 |
| YER120W | SCS2    | 1.75 | 0.81  | 5  |
| YLR354C | TAL1    | 1.02 | 0.03  | 8  |
| YJL138C | TIF2    | 0.75 | -0.42 | 22 |
| YPR074C | TKL1    | 1.19 | 0.25  | 5  |
| YMR111C | YMR111C | 1.16 | 0.21  | 52 |
| YBL023C | MCM2    | 2.29 | 1.19  | 6  |
| YEL032W | MCM3    | 2.22 | 1.15  | 12 |

**Supplementary Table 5.** The median abundance ratios of the peptides derived from the SILAC SUMO proteomic experiment comparing HZY3983 (light media) and HZY 2101 (heavy media). A minimum requirement of 5 peptides IDs was used to filter the results.

| Light: 3983<br>Heavy: 2101 |       |              |                              |                  |
|----------------------------|-------|--------------|------------------------------|------------------|
| ORF                        | Gene  | Median Ratio | Log <sub>2</sub> (Mutant/WT) | # of Peptide IDs |
| YLR314C                    | CDC3  | 1.03         | 0.04                         | 8                |
| YKR095W                    | MLP1  | 0.59         | -0.75                        | 13               |
| YIL149C                    | MLP2  | 0.78         | -0.36                        | 7                |
| YBR049C                    | REB1  | 0.32         | -1.65                        | 14               |
| YML010W                    | SPT5  | 1.00         | 0.00                         | 11               |
| YER148W                    | SPT15 | 2.47         | 1.31                         | 5                |
| YGR186W                    | TFG1  | 0.30         | -1.72                        | 21               |
| YGR252W                    | GCN5  | 0.17         | -2.55                        | 7                |
| YBR081C                    | SPT7  | 0.41         | -1.29                        | 7                |
| YKR025W                    | RPC37 | 1.65         | 0.72                         | 5                |
| YDL150W                    | RPC53 | 1.64         | 0.72                         | 9                |
| YAL001C                    | TFC3  | 1.34         | 0.42                         | 6                |
| YNL039W                    | BDP1  | 2.78         | 1.48                         | 15               |
| YOR028C                    | CIN5  | 0.23         | -2.13                        | 5                |
| YCR084C                    | TUP1  | 0.39         | -1.37                        | 19               |
| YNL167C                    | SKO1  | 0.02         | -5.66                        | 5                |
| YDR310C                    | SUM1  | 0.55         | -0.87                        | 7                |
| YOR344C                    | TYE7  | 1.01         | 0.01                         | 5                |
| YPL228W                    | CET1  | 0.14         | -2.81                        | 6                |
| YDR464W                    | SPP41 | 0.73         | -0.45                        | 38               |
| YDR169C                    | STB3  | 0.06         | -3.98                        | 11               |
| YBR215W                    | HPC2  | 0.07         | -3.92                        | 10               |
| YDR359C                    | VID21 | 0.30         | -1.74                        | 5                |
| YLR357W                    | RSC2  | 0.35         | -1.53                        | 7                |
| YFR037C                    | RSC8  | 0.58         | -0.78                        | 8                |
| YAL011W                    | SWC3  | 0.19         | -2.41                        | 7                |
| YDR485C                    | VPS72 | 0.14         | -2.80                        | 11               |
| YDR110W                    | FOB1  | 1.41         | 0.49                         | 6                |
| YFR028C                    | CDC14 | 35.18        | 5.14                         | 12               |
| YJL076W                    | NET1  | 20.00        | 4.32                         | 99               |
| YNL216W                    | RAP1  | 0.34         | -1.56                        | 13               |
| YDR227W                    | SIR4  | 0.45         | -1.16                        | 25               |

|         |       |      |       |    |
|---------|-------|------|-------|----|
| YKR010C | TOF2  | 6.93 | 2.79  | 14 |
| YBL097W | BRN1  | 0.95 | -0.07 | 5  |
| YJR089W | BIR1  | 0.96 | -0.05 | 16 |
| YGR140W | CBF2  | 3.23 | 1.69  | 5  |
| YBR156C | SLI15 | 0.91 | -0.13 | 5  |
| YKL112W | ABF1  | 0.28 | -1.85 | 13 |
| YBR088C | POL30 | 0.52 | -0.95 | 9  |
| YDR390C | UBA2  | 0.80 | -0.32 | 7  |
| YDL064W | UBC9  | 0.28 | -1.82 | 6  |
| YDR409W | SIZ1  | 0.45 | -1.15 | 6  |
| YNL042W | BOP3  | 0.12 | -3.08 | 14 |
| YDL126C | CDC48 | 4.83 | 2.27  | 21 |
| YLR044C | PDC1  | 1.16 | 0.22  | 5  |
| YCR012W | PGK1  | 0.56 | -0.84 | 12 |
